# Supplementary material for: High-Speed Videoendoscopy Enhances the Objective Assessment of Glottic Organic Lesions: A Case-Control Study with Multivariable Data-Mining Model Development
Source: MDPI journal article supplement (doi:10.3390/cancers15143716), 2023-07-22
Supplement: s1 [file s1]

## Normophonic vs any organic lesion

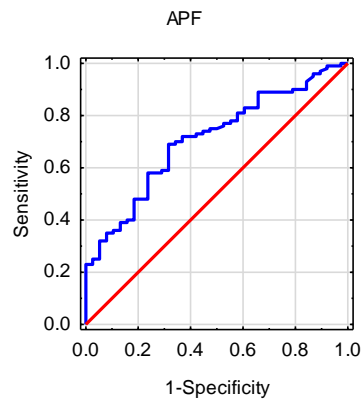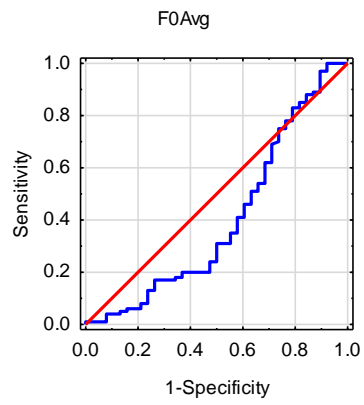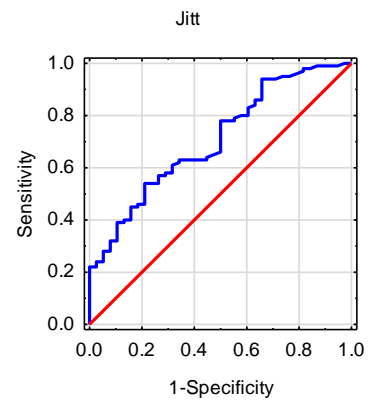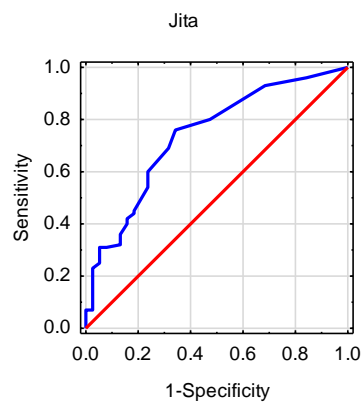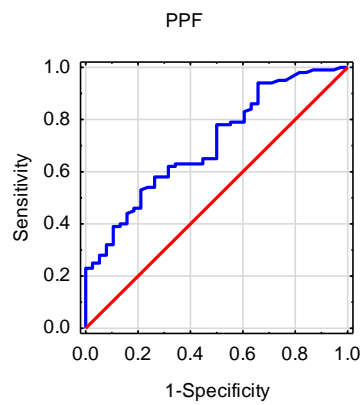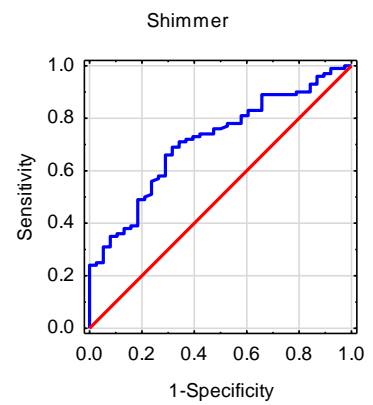

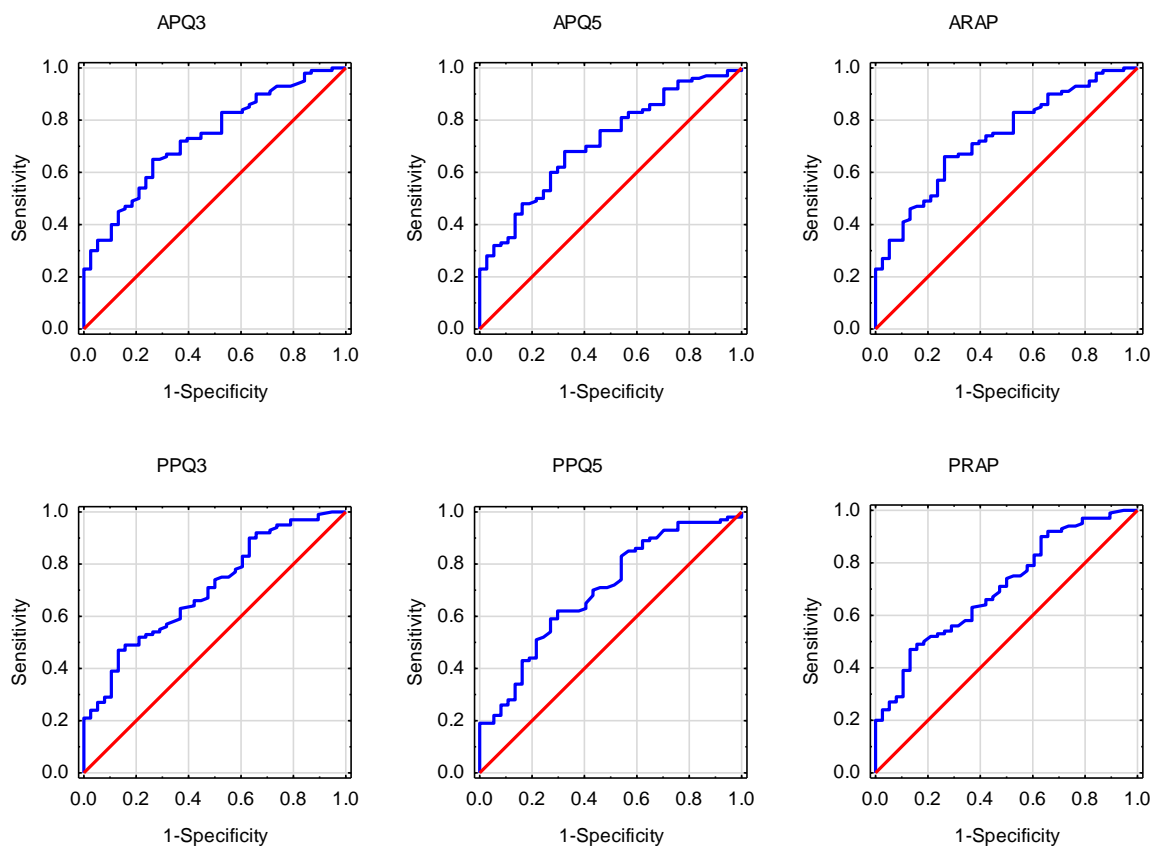

|                        |       |       |               |               |       |        |
|------------------------|-------|-------|---------------|---------------|-------|--------|
| Zmienna: Jita [ms]_2   |       |       |               |               |       |        |
|                        | AUC   | SE    | AUC Dolny 95% | AUC Górny 95% | z     | p      |
| 1                      | 0.739 | 0.047 | 0.646         | 0.832         | 5.036 | 0.0000 |
| Zmienna: APQ3 [%]_2    |       |       |               |               |       |        |
|                        | AUC   | SE    | AUC Dolny 95% | AUC Górny 95% | z     | p      |
| 1                      | 0.733 | 0.045 | 0.644         | 0.821         | 5.161 | 0.0000 |
| Zmienna: ARAP [%]_2    |       |       |               |               |       |        |
|                        | AUC   | SE    | AUC Dolny 95% | AUC Górny 95% | z     | p      |
| 1                      | 0.731 | 0.045 | 0.642         | 0.819         | 5.099 | 0.0000 |
| Zmienna: APQ5 [%]_2    |       |       |               |               |       |        |
|                        | AUC   | SE    | AUC Dolny 95% | AUC Górny 95% | z     | p      |
| 1                      | 0.715 | 0.047 | 0.624         | 0.807         | 4.616 | 0.0000 |
| Zmienna: Shimmer [%]_2 |       |       |               |               |       |        |
|                        | AUC   | SE    | AUC Dolny 95% | AUC Górny 95% | z     | p      |
| 1                      | 0.712 | 0.046 | 0.621         | 0.803         | 4.577 | 0.0000 |
| Zmienna: APF [%]_2     |       |       |               |               |       |        |
|                        | AUC   | SE    | AUC Dolny 95% | AUC Górny 95% | z     | p      |
| 1                      | 0.709 | 0.046 | 0.618         | 0.8           | 4.499 | 0.0000 |
| Zmienna: PPF [%]_2     |       |       |               |               |       |        |
|                        | AUC   | SE    | AUC Dolny 95% | AUC Górny 95% | z     | p      |
| 1                      | 0.708 | 0.047 | 0.615         | 0.801         | 4.392 | 0.0000 |
| Zmienna: Jitt [%]_2    |       |       |               |               |       |        |
|                        | AUC   | SE    | AUC Dolny 95% | AUC Górny 95% | z     | p      |
| 1                      | 0.708 | 0.048 | 0.615         | 0.801         | 4.372 | 0.0000 |

|                       |       |       |               |               |       |        |
|-----------------------|-------|-------|---------------|---------------|-------|--------|
| Zmienna: PRAP [%]_2   |       |       |               |               |       |        |
|                       | AUC   | SE    | AUC Dolny 95% | AUC Górny 95% | z     | p      |
| 1                     | 0.705 | 0.048 | 0.612         | 0.798         | 4.312 | 0.0000 |
| Zmienna: PPQ3 [%]_2   |       |       |               |               |       |        |
|                       | AUC   | SE    | AUC Dolny 95% | AUC Górny 95% | z     | p      |
| 1                     | 0.705 | 0.048 | 0.611         | 0.798         | 4.305 | 0.0000 |
| Zmienna: PPQ5 [%]_2   |       |       |               |               |       |        |
|                       | AUC   | SE    | AUC Dolny 95% | AUC Górny 95% | z     | p      |
| 1                     | 0.697 | 0.05  | 0.6           | 0.795         | 3.963 | 0.0001 |
| Zmienna: F0Avg [Hz]_2 |       |       |               |               |       |        |
|                       | AUC   | SE    | AUC Dolny 95% | AUC Górny 95% | z     | p      |
| 1                     | 0.405 | 0.06  | 0.288         | 0.521         | -1.6  | 0.1096 |

Benign vs Malignant organic lesion

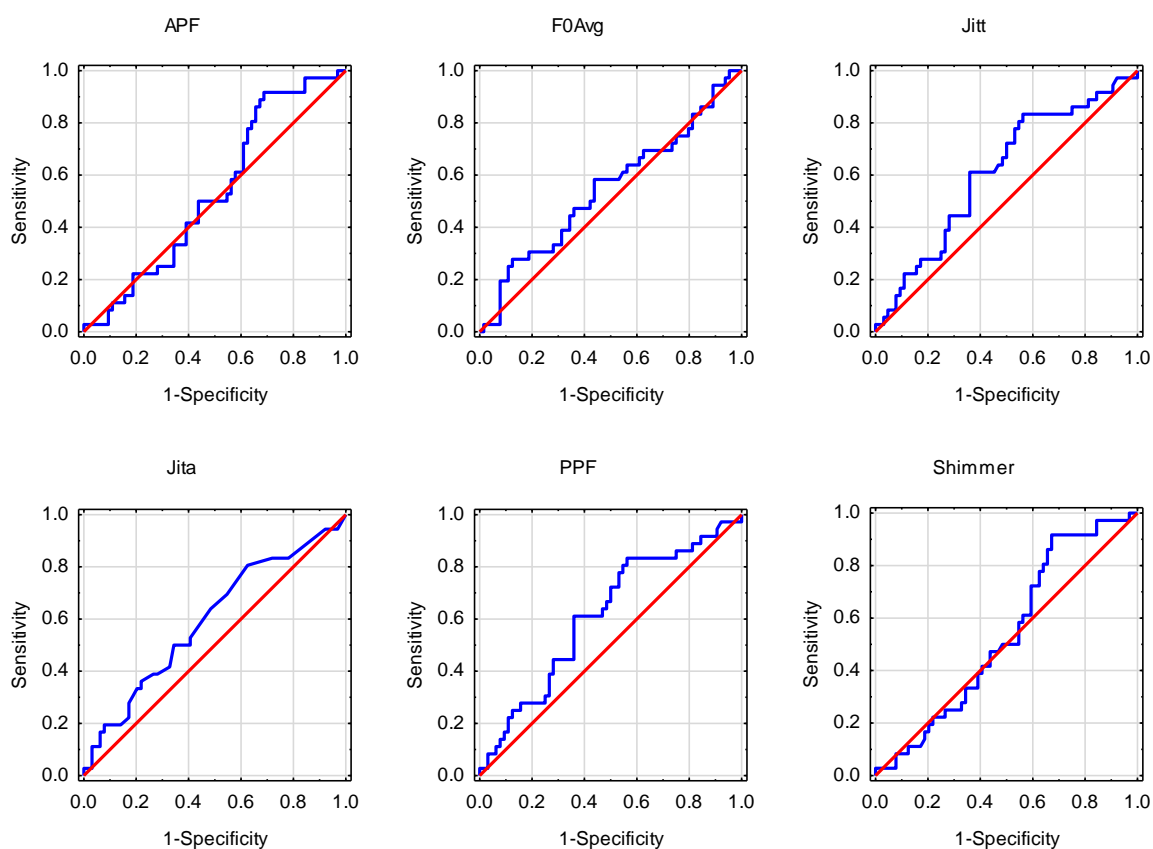

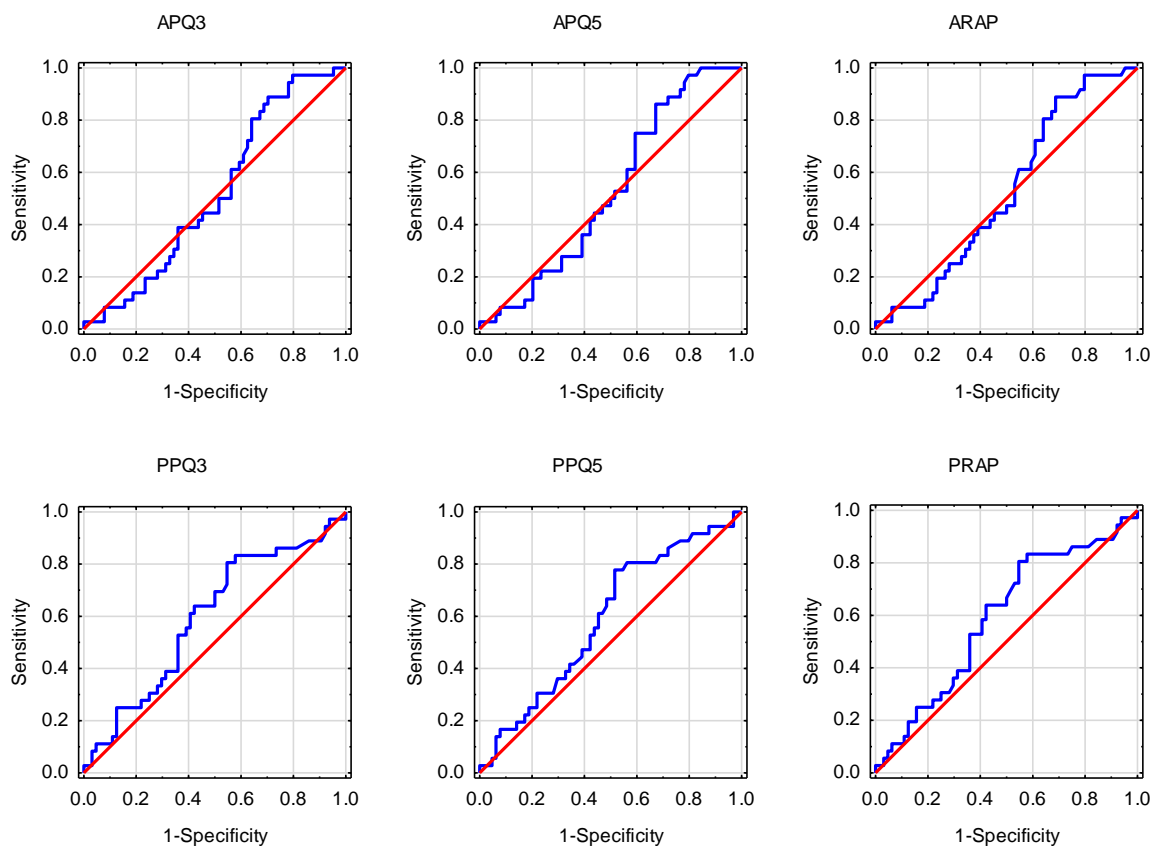

|                        |       |       |               |               |       |        |
|------------------------|-------|-------|---------------|---------------|-------|--------|
| Zmienna: PPF [%]_2     |       |       |               |               |       |        |
|                        | AUC   | SE    | AUC Dolny 95% | AUC Górný 95% | z     | p      |
| 1                      | 0.613 | 0.058 | 0.499         | 0.728         | 1.942 | 0.0521 |
| Zmienna: Jitt [%]_2    |       |       |               |               |       |        |
|                        | AUC   | SE    | AUC Dolny 95% | AUC Górný 95% | z     | p      |
| 1                      | 0.612 | 0.058 | 0.497         | 0.726         | 1.91  | 0.0561 |
| Zmienna: Jita [ms]_2   |       |       |               |               |       |        |
|                        | AUC   | SE    | AUC Dolny 95% | AUC Górný 95% | z     | p      |
| 1                      | 0.596 | 0.06  | 0.479         | 0.712         | 1.606 | 0.1082 |
| Zmienna: PPQ3 [%]_2    |       |       |               |               |       |        |
|                        | AUC   | SE    | AUC Dolny 95% | AUC Górný 95% | z     | p      |
| 1                      | 0.594 | 0.059 | 0.479         | 0.71          | 1.599 | 0.1099 |
| Zmienna: PRAP [%]_2    |       |       |               |               |       |        |
|                        | AUC   | SE    | AUC Dolny 95% | AUC Górný 95% | z     | p      |
| 1                      | 0.591 | 0.059 | 0.475         | 0.706         | 1.542 | 0.1230 |
| Zmienna: PPQ5 [%]_2    |       |       |               |               |       |        |
|                        | AUC   | SE    | AUC Dolny 95% | AUC Górný 95% | z     | p      |
| 1                      | 0.589 | 0.058 | 0.475         | 0.704         | 1.529 | 0.1262 |
| Zmienna: F0Avg [Hz]_2  |       |       |               |               |       |        |
|                        | AUC   | SE    | AUC Dolny 95% | AUC Górný 95% | z     | p      |
| 1                      | 0.546 | 0.062 | 0.425         | 0.666         | 0.744 | 0.4567 |
| Zmienna: Shimmer [%]_2 |       |       |               |               |       |        |
|                        | AUC   | SE    | AUC Dolny 95% | AUC Górný 95% | z     | p      |
| 1                      | 0.537 | 0.058 | 0.423         | 0.65          | 0.637 | 0.5244 |

|                     |       |       |               |               |       |        |
|---------------------|-------|-------|---------------|---------------|-------|--------|
| Zmienna: APF [%]_2  |       |       |               |               |       |        |
|                     | AUC   | SE    | AUC Dolny 95% | AUC Górny 95% | z     | p      |
| 1                   | 0.536 | 0.058 | 0.422         | 0.649         | 0.613 | 0.5401 |
| Zmienna: APQ5 [%]_2 |       |       |               |               |       |        |
|                     | AUC   | SE    | AUC Dolny 95% | AUC Górny 95% | z     | p      |
| 1                   | 0.529 | 0.058 | 0.416         | 0.642         | 0.505 | 0.6136 |
| Zmienna: ARAP [%]_2 |       |       |               |               |       |        |
|                     | AUC   | SE    | AUC Dolny 95% | AUC Górny 95% | z     | p      |
| 1                   | 0.525 | 0.058 | 0.412         | 0.638         | 0.432 | 0.6658 |
| Zmienna: APQ3 [%]_2 |       |       |               |               |       |        |
|                     | AUC   | SE    | AUC Dolny 95% | AUC Górny 95% | z     | p      |
| 1                   | 0.521 | 0.058 | 0.408         | 0.635         | 0.371 | 0.7105 |
